# Supplementary material for: Two-way Dispatched function in Sonic hedgehog shedding and transfer to high-density lipoproteins
Source: eLife journal article supplement (doi:10.7554/elife.86920), 2023-05-11
Supplement: fig1-data1 [file elife-86920-fig1-data1-v1.zip]

## Sheet: Sheet1
Reverse-phase HPLC of Shh variants released under serum-depleted conditions
Shh		Fraktion	% medium	%
		25	0	0
		26	0	0
		27	22.2	0
		28	100	0
		29	39.1	0.642337
		30	13.4	0.647668
		31	10	1.83248
		32	14.3	7.35157
		33	22.7	68.5249
		34	30.3	100
		35	10.2	61.9763
		36	9.3	3.63269
		37	10.3	2.40274
		38	6.6	0.756142
							Figure 1A
C25SShh	26	2	0	0
	27	3	9298660	100
	28	4	7541832	81.1067
	29	5	1346134	14.4766
	30	6	1907154	20.51
	31	7	2531811	27.2277
	32	8	57950	0.623208
	33	9	2901903	31.2078
	34	10	1407054	15.1318
	35	11	593205	6.37947
	36	12	302991	3.25844
	37	13	64950	0.698488
	38	14	0	0
							Figure 1B''
ShhN	Fraktion	lane	Area	%
	25	1	0	0
	26	2	0	0
	27	3	1383.49	3.57725
	28	4	38674.8	100
	29	5	2586.02	6.68659
	30	6	1501.95	3.88355
	31	7	1122.99	2.90367
	32	8	859.167	2.22152
	33	9	942.359	2.43662
	34	10	552.296	1.42805
	35	11	599.004	1.54882
	36	12	334.305	0.864401
	37	13	231.163	0.59771
	38	14	458.92	1.18661
C25SShhN	Fraktion		Area	%
	25
	25	1	2887.76	6.68837	auf 2. Gel
	26		22887	53
	27	2	43175.8	100	auf 2. Gel
	28	3	25383.1	58.7902	auf 2. Gel
	29	4	351.447	0.813991	auf 2. Gel
	30	5	564.267	1.30691	auf 2. Gel
	31	6	697.752	1.61607	auf 2. Gel
	32	7	255.376	0.59148	auf 2. Gel
	33	8	1093.67	2.53307	auf 2. Gel
	34	9	102.678	0.237814	auf 2. Gel
	35	10	141.577	0.327908	auf 2. Gel
	36	11	655.631	1.51852	auf 2. Gel
	37	12	433	1.00288
	38	12	436.953	1.01203	auf 2. Gel
	38
	38	13	400	0.926446
								Figure 1D''
