# Supplementary material for: Two-way Dispatched function in Sonic hedgehog shedding and transfer to high-density lipoproteins
Source: eLife journal article supplement (doi:10.7554/elife.86920), 2023-05-11
Supplement: fig3-data1 [file elife-86920-fig3-data1-v1.zip]

## Sheet: Sheet1
Shh serum-depleted
VK187	Fraktion	lane	Area	%		Fraktion	%
H7+A47 0% FCS media	25	1	0	0		25	0
ntCtrl	26	2	0	0		26	0
ZU	27	3	1100	2.22961		27	2.22961
	28	4	49336	100		28	100
	29	5	8149	16.5174		29	16.5174
	30	6	4778	9.68461		30	9.68461
	31	7	1257	2.54784		31	2.54784
	32	8	3402	6.89557		32	6.89557
	33	9	4995	10.1245		33	10.1245
	34	10	6302	12.7736		34	12.7736
	35	11	16658	33.7644		35	43.7644
	36	12	14613	29.6193		36	39.6193
	37	13	5221	10.5825		37	10.5825
	38	14	0	0		38	0
										Figure 3A''
Shh in 0.05% FCS
Probe 5	Fraktion	lane	Area	%
H7+A47 0,05% FCS media	25	1	26.95	0.128911
ntCtrl	26	2	397.991	1.90373
	27	3	20435	97.7475
	28	4	20905.9	100
	29	5	14766.9	70.6352
	30	6	474.305	2.26877
	31	7	1514.37	7.24375
	32	8	3259.31	15.5904
	33	9	4914.94	23.5099
	34	10	4144.96	19.8268
	35	11	4597.64	21.9921
	36	12	10396.8	49.7314
	37	13	2133.05	10.2031
	38	14	208.678	0.99818
							Figure 3B''
Shh in 5% FCS
VK188 Probe 12	Fraktion	lane	Area	%
nt Ctrl cells	25	1	0	0
H7+A47	26	2	0	0
5% FCS	27	3	0	0
	28	4	22770.9	62.3118
	29	5	21118.4	57.79
	30	6	1815.59	4.96832
	31	7	700.38	1.91657
	32	8	682.447	1.8675
	33	9	24200.5	66.2239
	34	10	36543.4	100
	35	11	18600.8	50.9007
	36	12	4538.23	12.4187
	37	13	7025.05	19.2238
	38	14	1020.8	2.7934
								Figure 3 C''
Shh in 10% FCS
VK188 Probe 13	Fraktion	lane	Area	%
nt Ctrl cells	25	1	0	0
H7+A47	26	2	0	0
10% FCS	27	3	0	0
	28	4	14957.2	32.493
	29	5	4596.66	9.98577
	30	6	2093.26	4.54738
in der Präsentation und dem Poster	31	7	263.678	0.572814
	32	8	5210.44	11.3191
	33	9	46032.1	100
	34	10	25839.1	56.1327
	35	11	8127.48	17.6561
	36	12	8706.09	18.9131
	37	13	9532.43	20.7082
	38	14	884.577	1.92165
								Figure D''
