# Supplementary material for: Two-way Dispatched function in Sonic hedgehog shedding and transfer to high-density lipoproteins
Source: eLife journal article supplement (doi:10.7554/elife.86920), 2023-05-11
Supplement: fig4-data1 [file C_H7 GF FCS activity.xlsx]

## Sheet: Plate 3 - Sheet1
Software Version	2014-01-02
Experiment File Path:
Protocol File Path:	C:\Users\Public\Documents\Protocols\Enzyme 405 nm.prt
Plate Number	Plate 3
Date	2022-08-31
Time	14:08:56
Reader Type:	Synergy HT
Reader Serial Number:	188765
Reading Type	Reader
Procedure Details
Plate Type	96 WELL PLATE
Read	Absorbance Endpoint
	A1..G12
	Wavelengths: 405
	Read Speed: Normal
Layout
	Gel filtration fractions
		1	2	3	4	5	6	7	8	9	10	11	12
Run#1	A	1	1	2	2	3	3	4	4	5	5	6	6	Well ID
	B	7	7	8	8	9	9	10	10	11	11	12	12	Well ID
Run#2	C	1	1	2	2	3	3	4	4	5	5	6	6	Well ID
	D	7	7	8	8	9	9	10	10	11	11	12	12	Well ID
blank (media) controls	E													Well ID
	F													Well ID
	G													Well ID
	H													Well ID
Results
Actual Temperature:	26.8
		1	2	3	4	5	6	7	8	9	10	11	12
	A	0.167	0.164	1.353	1.35	1.144	1.146	0.673	0.677	0.623	0.64	0.626	0.688	405
	B	0.743	0.61	0.52	0.525	0.286	0.292	0.193	0.198	0.182	0.186	0.184	0.2	405
	C	0.626	0.529	0.926	0.864	0.84	0.806	0.578	0.561	0.407	0.43	0.466	0.582	405
	D	0.817	0.646	0.465	0.456	0.254	0.255	0.2	0.206	0.186	0.212	0.163	0.178	405
	E	0.054	0.054	0.052	0.052	0.051	0.052	0.051	0.052	0.051	0.053	0.053	0.052	405
	F	0.053	0.055	0.054	0.052	0.052	0.053	0.051	0.052	0.052	0.054	0.056	0.052	405
	G	0.051	0.055	0.053	0.051	0.051	0.052	0.051	0.052	0.052	0.055	0.053	0.055	405
	H													405
