# Supplementary material for: Two-way Dispatched function in Sonic hedgehog shedding and transfer to high-density lipoproteins
Source: eLife journal article supplement (doi:10.7554/elife.86920), 2023-05-11
Supplement: fig4-data1 [file elife-86920-fig4-data1-v1.zip]

## Sheet: Sheet1
Shh and Scube2 release in nserum presence. Fractions of the eluates were assayed in C3H10T1/2 cells for bioactivity.
	Scube normalized	ApoA1 normalized	% H7 FCS	av C3H10 assay
	0	20.2935	57.7163	56.6251
	0	55.2733	100	100
	0	91.7993	49.0476	90.2671
	0	100	38.6642	59.877
	1.55622	88.8927	32.7457	45.2989
	3	46.0078	25.6512	49.9455
	17.2966	1.02491	22.4524	47.4022
	100	0	15.4565	40.9313
	0	0	28.4157	13.238
	0	0	56.3648	15.3613
	0	0	79.943	18.2983
	0	0	73.9689	20.7553
							Figure 4C
Drosophila Hh released in serum presence
	Fraktion	10% FCS	X23	ApoA1 normalized
	1	3.32526	10	20.2935
	2	41.9182	20.078	55.2733
	3	100	100	91.7993
	4	64.2989	54.1534	100
	5	45.6139	45.1414	88.8927
	6	38.1011	45.7913	46.0078
	7	13.2021	34.3786	1.02491
	8	0	7.34037	0
	9	0	6.32676	0
	10	15.3152	8.05604	0
	11	3.33364	2.26648	0
	12	4.68662	1.53904	0
	Fraktion
