# Supplementary material for: Two-way Dispatched function in Sonic hedgehog shedding and transfer to high-density lipoproteins
Source: eLife journal article supplement (doi:10.7554/elife.86920), 2023-05-11
Supplement: fig5-data1 [file elife-86920-fig5-data1-v1.zip]

## Sheet: Sheet1
	Fraktion	lane	Area	%
	25	1	0	0
	26	2	0	0
	27	3	0	0
	28	4	21204.5	100
	29	5	1717.99	8.10199
	30	6	230.607	1.08754
	31	7	251.778	1.18738
	32	8	83.92	0.395764
	33	9	157.92	0.744746
	34	10	104.749	0.493993
	35	11	282.607	1.33277
	36	12	430.849	2.03187
	37	13	0	0
	38	14	0	0
	Fraktion	lane	H7 ohne HDL	Scube2
	25	1	0.456673	0
	26	2	0.799178	0
	27	3	1.02751	0
	28	4	0.799178	0
	29	5	1.0846	0
	30	6	1.14168	6.8616
	31	7	1.37002	100
	32	8	2.19888	61.5812
	33	9	8.55463	10.6481
	34	10	77.7883	0
	35	11	100	0
	36	12	15.8202	0
										Figure 5A''
Fraktion	lane	Area	%
25	1	0	0
26	2	0	0
27	3	0	0
28	4	1142.96	2.71003
29	5	1011.98	2.39947
30	6	2177.16	5.1622
31	7	5750.35	13.6345
32	8	37823.9	89.6833
33	9	42175	100
34	10	35924.8	85.1802
35	11	26481.4	62.7892
36	12	6129.65	14.5338
37	13	2174.34	5.15552
38	14	0	0
Fraktion	lane	C3H10	H7 HDL V766	Scube	ApoA1
25	1	22.1883	3.53211	0	15.8819
26	2	23.2693	12.7593	0	39.3272
27	3	38.8311	15.6719	0	54.7667
28	4	100	62.063	0	76.7348
29	5	94.8873	100	0	100
30	6	41.2709	18.9776	6.8616	37.744
31	7	11.4078	5.34892	100	9.54586
32	8	7.19999	0	61.5812	3.81942
33	9	2.68769	0	10.6481	1.75953
34	10	4.03153	2.49876	0	0
35	11	1.84844	5.70291	0	0
36	12	0	0	0	0
						Figure 5B''
