# Supplementary material for: Two-way Dispatched function in Sonic hedgehog shedding and transfer to high-density lipoproteins
Source: eLife journal article supplement (doi:10.7554/elife.86920), 2023-05-11
Supplement: fig7-data1 [file elife-86920-fig7-data1-v1.zip]

## Sheet: Sheet1
ShhN with HDL								without HDL
%	average ApoA1 with HDL							%									H18 with HDL
0	0							0									%	average ApoA1 with HDL
0	8.99241							0									0	0
0	18.9985							0									0	8.99241
2.16438	53.7499							0									0	18.9985
6.35036	100							0									2.16438	53.7499
3.18863	60.5772							0									6.35036	100
1.68019	27.5017							0									3.18863	60.5772
3.71834	16.0343							0									1.68019	27.5017
20.543	0							0									3.71834	16.0343
72.5915	0							93.4862									20.543	0
100	0							100									72.5915	0
23.0074	0							22.7504									100	0
																	23.0074	0
				Figure 7A''							Figure 7A'
	V766 Halo serum-free expression
	lane	Area	%										S176 V766		without HDL
	1	0	0									Fraktion	lane	Area	%
	2	0	0									1	1	10828	26.59
	3	0	0									2	2	23584	57.9146
	4	0	0									3	3	23668	58.1209
	5	0	0									4	4	10614	26.0645
	6	0	0									5	5	11332	27.8277
	7	13081	24.874									6	6	3444	8.45734
	8	52589	100									7	7	12950	31.801
	9	18169	34.5491									8	8	10452	25.6667
	10	2371	4.50855									9	9	6356	15.6083
	11	0	0									10	10	23858	58.5875
	12	0	0									11	11	40722	100
												12	12	22472	55.1839
						Figure 7E											Figure 7B'
	average S176 with HDL	average S176 with HDL from Disp KO cells	average ApoA1 with HDL
	0	3.84571	0										average S176 with HDL	average ApoA1 with HDL
	7.19064	9.17606	8.99241										0	0
	52.7271	27.6705	18.9985										7.19064	8.99241
	100	92.5403	53.7499										52.7271	18.9985
	93.9677	100	100										100	53.7499
	28.0457	55.9279	60.5772										93.9677	100
	4.32615	15.4441	27.5017										28.0457	60.5772
	1.68904	10.0888	16.0343										4.32615	27.5017
	1.89003	11.4584	0										1.68904	16.0343
	9.82007	46.4239	0										1.89003	0
	14.4855	37.6025	0										9.82007	0
	2.64152	7.89644	0										14.4855	0
													2.64152	0
																		Figure 7B''
						Figure 7C
	V766 ApoA1 GF normal serum free conditions
	lane	Area	%
	1	0	0
	2	0	0
	3	0	0
	4	0	0
	5	0	0
	6	0	0
	7	0	0
	8	0	0
	9	37478	81.9962
	10	45707	100
	11	0	0
	12	0	0
							Figure 7D
